# Supplementary material for: Aluminum Stress Induces Irreversible Proteomic Changes in the Roots of the Sensitive but Not the Tolerant Genotype of Triticale Seedlings
Source: MDPI journal article supplement (doi:10.3390/plants11020165), 2022-01-08
Supplement: s1 [file s1]

# Supplementary Materials

## Aluminum Stress Induces Irreversible Proteomic Changes in the Roots of the Sensitive but Not the Tolerant Genotype of Triticale Seedlings

Agnieszka Niedziela <sup>1\*</sup>, Lucyna Domzalska <sup>2</sup>, Wioletta M. Dynkowska <sup>1</sup> and Markéta Pernisová <sup>3,4</sup>, Krystyna Rybka <sup>1\*</sup>

<sup>1</sup> Department of Biochemistry and Biotechnology, Plant Breeding and Acclimatization Institute-National Research Institute in Radzików, 05-870 Blonie, Poland; w.dynkowska@ihar.edu.pl

<sup>2</sup> Polish Academy of Sciences Botanical Garden – Center for Biological Diversity Conservation in Powsin, Prawdziwka 2, 02-973, Warsaw, Poland; lucyna.domzalska@gmail.com

<sup>3</sup> Plant Sciences Core Facility, Mendel Centre for Plant Genomics and Proteomics, Central European Institute of Technology (CEITEC), Masaryk University, Kamenice 5, 62500 Brno, Czechia; marketa.pernisova@ceitec.muni.cz

<sup>4</sup> Laboratory of Functional Genomics and Proteomics, National Centre for Biomolecular Research, Faculty of Science, Masaryk University, Kotlářská 2, 61137 Brno, Czechia.

\* Correspondence: a.niedziela@ihar.edu.pl (A.N.); k.rybka@ihar.edu.pl (K.R.);  
Tel.: +48-227-334-535 (A.N.); +48-227-334-537 (K.R.)

### Content:

**Figure S1** The stages of the experiment: (A) triticale seeds germinating on the polyethylene grid tray; (B) 5<sup>th</sup> days old triticale seedlings; (C) the growth chamber view.

**Figure S2** Protein separation by 2-DE on gels stained in Coomassie Brilliant Blue (A-F). Proteome of L17 Al-sensitive line control (A) and 48h after Al stress treated (B); proteome of L444 Al-sensitive line control (C) and 48h after Al stress treated (D); proteome of L198 Al-tolerant line control (E) and 48h after Al stress treated (F). The differential protein spots, which were common for both studied Al-sensitive lines, are marked in red on gel pictures of L17 and L444 line (control vs. Al-treated). The differential protein spots, which were characteristic only for one studied Al-sensitive lines, are marked in green on gel pictures of L17 and L444 line (control vs. Al-treated). The Image Master 2D Platinum 7.0 software was used for differential spots identification.

**Figure S3** Comparison in: A) number of up/down-regulated and silenced/induced proteins and B) number of common protein spots according to established criterions ( $p \leq 0.01$  and difference in spot intensity  $\geq 2$ -fold or 0.2 relative intensity of silenced/induced proteins).

When the criterion of probability has been weakened from 99% to 95% and twofold difference was not considered, more than 80% of differential proteins were common between control and stress-treated roots tips proteomes of Al-sensitive seedlings.

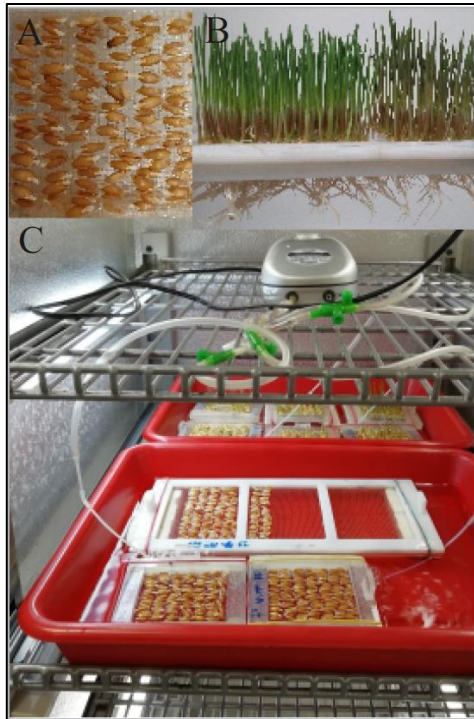

**Figure S1.** The stages of the experiment:  
(A) triticale seeds germinating on the polyethylene grid tray;  
(B) 5<sup>th</sup> days old triticale seedlings;  
(C) the growth chamber view.

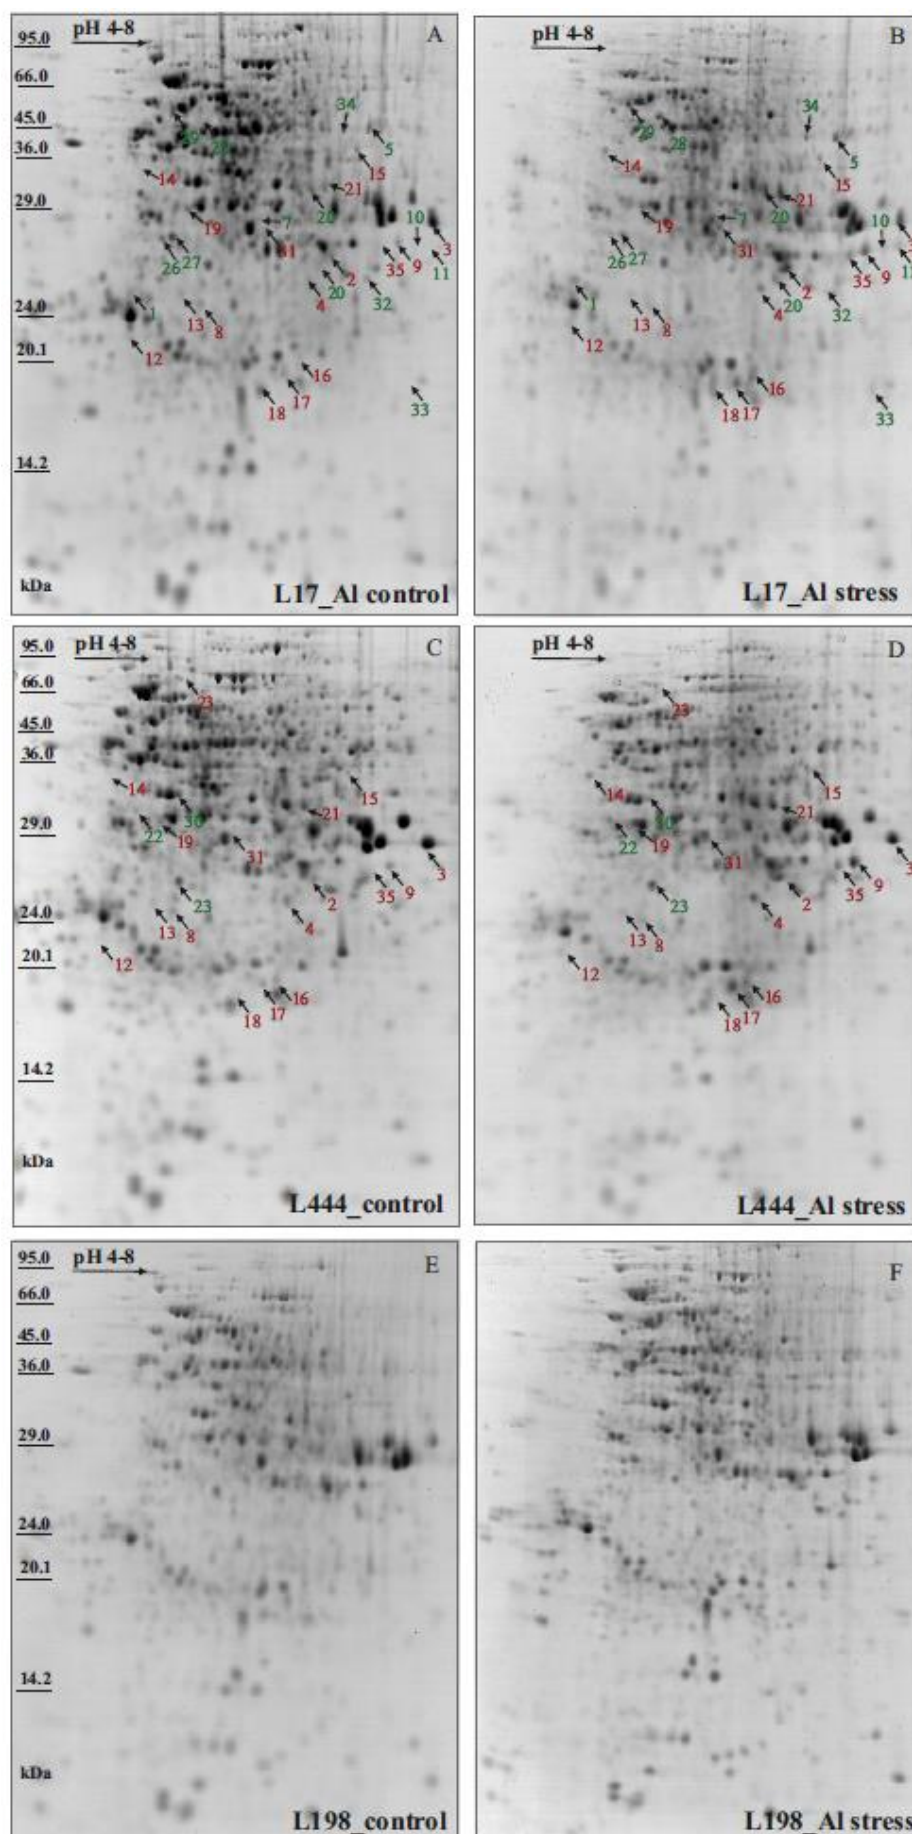

**Figure S2.** Protein separation by 2-DE on gels stained in Coomassie Brilliant Blue (A-F). Proteome of L17 Al-sensitive line control (A) and 48h after Al stress treated (B); proteome of L444 Al-sensitive line control (C) and 48h after Al stress treated (D); proteome of L198 Al-tolerant line control (E) and 48h after Al stress treated (F). The differential protein spots, which were common for both studied Al-sensitive lines, are marked in red on gel pictures of L17 and L444 line (control vs. Al-treated). The differential protein spots, which were characteristic only for one studied Al-sensitive lines, are marked in green on gel pictures of L17 and L444 line (control vs. Al-treated). The Image Master 2D Platinum 7.0 software was used for differential spots identification.

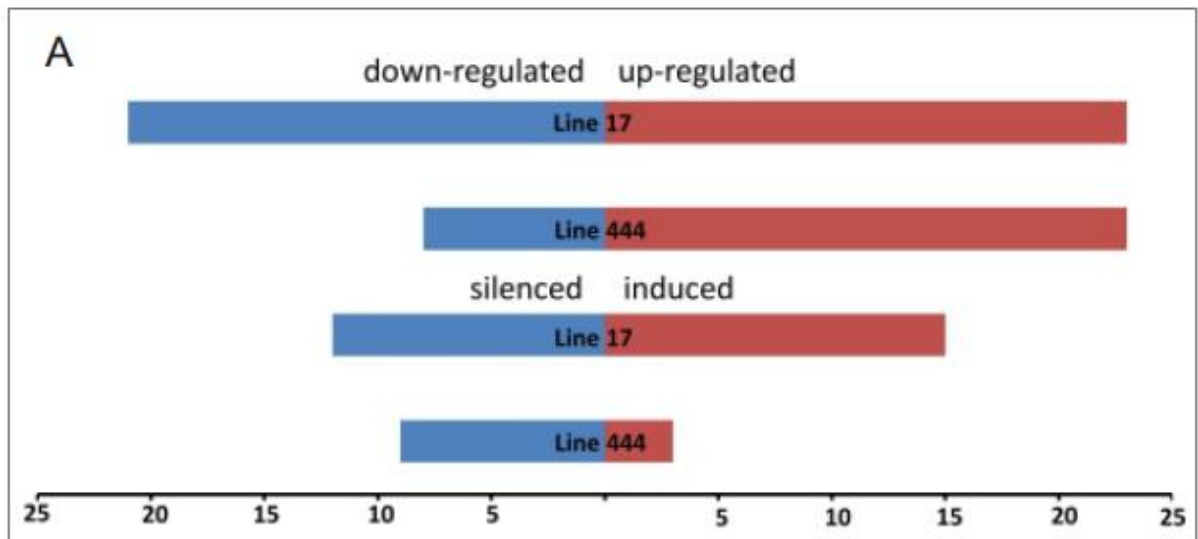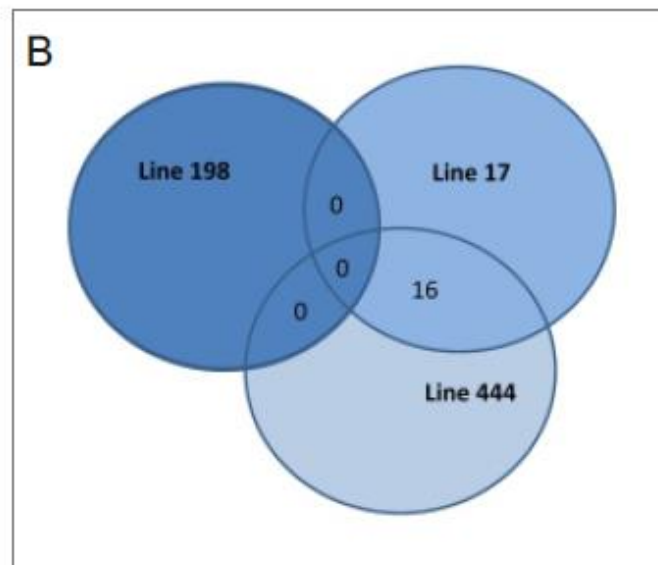

**Figure S3.** Comparison in: (A) number of up/down-regulated and silenced/induced proteins and (B) number of common protein spots according to established criterions ( $p \leq 0.01$  and difference in spot intensity  $\geq 2$ -fold or 0.2 relative intensity of silenced/induced proteins). When the criterion of probability has been weakened from 99% to 95% and twofold difference was not considered, more than 80% of differential proteins were common between control and stress-treated roots tips proteomes of Al-sensitive seedlings.
